# Supplementary material for: Evidence-based prioritisation and enrichment of genes interacting with metformin in type 2 diabetes
Source: Springer Nature journal article supplement (doi:10.1007/s00125-017-4404-2), 2017-08-25
Supplement: MOESM1 [file 14304190]

## **ESM Methods**

### **Developing evidence scoring algorithm**

Studies were categorized into three different groups:

- A. *Clinical outcomes studies*. Studies within this category assess differences in clinical endpoints including but not limited to side effects, rate of cure, morbidity, and mortality. In these studies changes in the clinical outcome have been observed due to administration of metformin in the presence or absence of the mutation.
- B. *PK and PD studies*. PK studies investigate the effect of a gene variant on absorption, distribution, metabolism, or excretion of the drug. Within these studies, presence or absence of the gene variant affects concentration of the drug. PD studies refer to interaction of the drug and the site of action. If a given gene variant causes differences in a biomarker in response to the drug, then it is regarded as PD type of interaction.
- C. *Molecular and cellular functional studies*. Functional assays, for which there are changes in expression or activation of the gene or the respective protein or the whole cell in response to metformin, are included within this category of studies.

### *Genotyping and quality control*

SNP genotype data on 1304 metformin treated patients were generated using the Affymetrix Genome-Wide Human SNP array 6.0 (Affymetrix, Santa Clara, CA, USA) and the remaining 1194 on Illumina HumanOminExpress (Illumina, Inc., San Diego, CA, USA). Each GWAS dataset was imputed to the 1000 Genomes CEU reference panel using the IMPUTE software [1]. Standard quality-control procedures were applied to each dataset: for example, SNPs with a minor allele frequency  $<5\%$ , a call rate  $<98\%$ , a Hardy-Weinburg equilibrium  $p$ -value  $<10 \times 10^{-6}$ , or imputation quality  $<40\%$  were removed. Samples with heterozygosity  $>3$  standard deviation from the mean or correlated with another sample (identity by descent  $>0.125$ ) or markers with a high missing call rate  $>1\%$  were filtered.

### **Gene-set enrichment analysis**

GSEA was performed to test whether any of the above sets of genes were represented more frequently than would be expected by chance. MAGENTA uses SNP association  $p$ -values and chromosome positions from the GWAS data as input. Each gene was scored based on  $p$ -values

among all of the SNPs located within or -110 kb upstream and +40 kb downstream from the gene. Gene scores were obtained after applying a step-wise multiple linear regression analysis corrected for gene size, number of SNPs per kb, number of independent SNPs per kb, number of recombination hotspots per kb, linkage disequilibrium units per kb and genetic distance. It tests whether the distribution of gene  $p$ -values in a given gene set is skewed towards low  $p$ -values compared with equal sized 10, 000 randomly sampled gene sets. Significant skewness below a given  $p$ -value cut off (enrichment cut off) suggests enrichment of the gene set. The 75<sup>th</sup> percentile  $p$ -value of all the genes was used as the enrichment cut-off in this analysis. The human leukocyte antigen (HLA) region was excluded from the analysis.

1. Howie BN, Donnelly P, Marchini J (2009) A flexible and accurate genotype imputation method for the next generation of genome-wide association studies. *PLoS Genetics* 5: e1000529.

### **ESM Tables and Figures**

ESM Table 1. Drug dictionary with Generic names, Brand names, Chemical names and synonyms for metformin.

| Chemical names                      | Brand names   |               |                    | Generic names           |
|-------------------------------------|---------------|---------------|--------------------|-------------------------|
| 1,1-Dimethylbiguanide               | Apo-Metformin | Glucophage XR | PMS-Metformin      | Metformin hydrochloride |
| 1,1-Dimethylbiguanide hydrochloride | Fluamine      | Glumetza      | Ran-Metformin      | Metformin HCL           |
|                                     | Riomet        | Glyciphage    | Sandoz - metformin |                         |
| Dimethylbiguanide                   | Flumamine     | Glycon        | Ratio-Metformin    | Metformin               |
|                                     | Fortamet      | Diabefagos    | Mylan-Metformin    |                         |
|                                     | Gen-Metformin | Meguan        | Novo-Metformin     |                         |
|                                     | Glucophage    | Diabex        | Nu-Metformin       |                         |
|                                     | Diabefagos    | Metiguanide   | Teva-Metformin     |                         |
|                                     | Diabetosan    |               |                    |                         |

ESM Table 2. Example sentences from the corpus.

| PMID     | Sentence                                                                                                                                                         | Annotation | Sub-annotation | Impact |
|----------|------------------------------------------------------------------------------------------------------------------------------------------------------------------|------------|----------------|--------|
| 21505202 | <i>'The authors concluded that ATM acts upstream of AMPK and is required for complete response to metformin.'</i>                                                | DE         | A              | CR     |
| 21054339 | <i>'Metformin significantly inhibited MDR1 expression by blocking MDR1 gene transcription'</i>                                                                   | DE         | DI             | GE     |
| 12130709 | <i>'The purpose of the present study was to investigate the role of organic cation transporter 1 (Oct1) in the disposition of metformin.'</i>                    | DE         | HI             | PK     |
| 8651938  | <i>'GLUT5 gene expression was increased by metformin treatment only in the jejunum.'</i>                                                                         | IE         | A              | GE     |
| 23253948 | <i>'Pharmacokinetics of empagliflozin, a sodium glucose cotransporter-2 (SGLT2) inhibitor, and metformin following co-administration in healthy volunteers.'</i> |            | NISE           |        |

DE: Direct and Explicit, IE: Indirect and Explicit, A: Affirmative effect, DI: decreased interaction, HI: Hypothetical interaction, CR: Clinical relevance, GE: Gene expression, PK: Pharmacokinetics.

ESM Table 3. Genes associated with clinical outcome of metformin.

| Gene           | Freq. | A  | DI | N | Score |
|----------------|-------|----|----|---|-------|
| <i>SLC22A1</i> | 26    | 23 | 1  | 2 | 1     |
| <i>SLC47A1</i> | 18    | 18 | 0  | 0 | 1     |
| <i>STK11</i>   | 9     | 7  | 2  | 0 | 1     |
| <i>ATM</i>     | 8     | 7  | 0  | 1 | 1     |
| <i>PRKAA2</i>  | 2     | 2  | 0  | 0 | 1     |
| <i>SLC22A2</i> | 3     | 3  | 0  | 0 | 1     |
| <i>SHBG</i>    | 3     | 0  | 3  | 0 | 1     |

A: Affirmative interaction, DI: Decreased interaction, N: No effect, Freq: Frequency of occurrence, Score: Evidence score given.

ESM Table 4. Genes associated with PK or PD of metformin.

| Gene           | Freq. | A  | DI | N | Score |
|----------------|-------|----|----|---|-------|
| <i>SLC47A2</i> | 17    | 15 | 0  | 2 | 2     |
| <i>SLC22A3</i> | 11    | 10 | 0  | 1 | 2     |
| <i>SLC29A4</i> | 8     | 8  | 0  | 0 | 2     |
| <i>DDIT3</i>   | 2     | 2  |    |   | 2     |
| <i>FBP1</i>    | 2     |    | 2  |   | 2     |
| <i>FOXO3</i>   | 2     | 2  |    |   | 2     |
| <i>I2BR</i>    | 2     | 2  |    |   | 2     |
| <i>RPS6KB1</i> | 5     |    | 4  | 1 | 3     |
| <i>INS</i>     | 2     |    | 2  |   | 2     |
| <i>INSR</i>    | 4     | 4  |    |   | 2     |
| <i>IRS2</i>    | 2     | 2  |    |   | 2     |
| <i>KAT2A</i>   | 2     | 2  |    |   | 2     |
| <i>KLF15</i>   | 2     | 2  |    |   | 2     |
| <i>NROB2</i>   | 3     | 3  |    |   | 2     |
| <i>SIRT1</i>   | 4     | 4  |    |   | 2     |

A: Affirmative interaction, DI: Decreased interaction, N: No effect, Freq: Frequency of occurrence, Score: Evidence score given.

ESM Table 5. Genes with potential clinical relevance.

| Gene            | Freq. | A | DI | N | Score |
|-----------------|-------|---|----|---|-------|
| <i>MTOR</i>     | 11    | 1 | 9  | 1 | 3     |
| <i>SERPINE1</i> | 9     |   | 9  |   | 3     |
| <i>AKT1</i>     | 7     | 2 |    | 5 | 3     |
| <i>SLC2A2</i>   | 7     | 1 | 6  |   | 3     |
| <i>PIK3</i>     | 6     | 1 |    | 5 | 3     |
| <i>CFTR</i>     | 5     |   | 4  | 1 | 3     |
| <i>ERBB2</i>    | 5     |   | 5  |   | 3     |
| <i>G6PC</i>     | 5     |   | 5  |   | 3     |
| <i>GLP1</i>     | 5     | 4 |    | 1 | 3     |
| <i>HIF1A</i>    | 5     | 1 | 4  |   | 3     |
| <i>IL6</i>      | 5     |   | 5  |   | 3     |
| <i>PCK1</i>     | 5     |   | 5  |   | 3     |
| <i>PCK2</i>     | 5     |   | 4  | 1 | 3     |
| <i>SLC2A4</i>   | 5     | 5 |    |   | 2     |
| <i>TXNIP</i>    | 5     | 1 | 4  |   | 3     |
| <i>COX2</i>     | 4     |   | 3  | 1 | 3     |
| <i>CYP3A4</i>   | 4     |   | 4  |   | 3     |
| <i>IGFBP1</i>   | 4     | 3 |    | 1 | 3     |
| <i>MAPK1</i>    | 4     | 3 | 1  |   | 3     |
| <i>MAPK3</i>    | 4     |   | 3  | 1 | 3     |
| <i>PPARGCIA</i> | 4     | 4 |    |   | 3     |
| <i>SREBF1</i>   | 4     |   | 3  | 1 | 3     |
| <i>AGER</i>     | 3     |   | 3  |   | 3     |
| <i>BGLAP</i>    | 3     | 3 |    |   | 3     |
| <i>GAPDH</i>    | 3     |   | 3  |   | 3     |
| <i>KLF15</i>    | 3     |   | 3  |   | 3     |
| <i>MYC</i>      | 3     | 3 |    |   | 3     |
| <i>SEPP1</i>    | 3     |   | 3  |   | 3     |

|                |   |   |   |  |   |
|----------------|---|---|---|--|---|
| <i>ABCBI</i>   | 2 |   | 2 |  | 3 |
| <i>ALPP</i>    | 2 |   | 2 |  | 3 |
| <i>CASP3</i>   | 2 | 2 |   |  | 3 |
| <i>CCNE1</i>   | 2 |   | 2 |  | 3 |
| <i>TIMP2</i>   | 2 |   | 2 |  | 3 |
| <i>CYP19A1</i> | 2 |   | 2 |  | 3 |
| <i>DDIT4</i>   | 2 | 2 |   |  | 3 |
| <i>IL1RN</i>   | 2 | 2 |   |  | 3 |
| <i>IRS2</i>    | 2 | 2 |   |  | 3 |
| <i>MAPK8</i>   | 2 | 2 |   |  | 3 |
| <i>MEF2A</i>   | 2 | 2 |   |  | 3 |
| <i>NFKB</i>    | 2 |   | 2 |  | 3 |
| <i>NR1I2</i>   | 2 |   | 2 |  | 3 |
| <i>PKLR</i>    | 2 | 2 |   |  | 3 |
| <i>PPARA</i>   | 2 |   | 2 |  | 3 |
| <i>PPP2R4</i>  | 2 | 2 |   |  | 3 |
| <i>RAB4A</i>   | 2 | 2 |   |  | 3 |
| <i>RPS6KA</i>  | 2 |   | 2 |  | 3 |
| <i>STAT3</i>   | 2 |   | 2 |  | 3 |
| <i>TNFA</i>    | 2 |   | 2 |  | 3 |
| <i>TP53</i>    | 2 |   | 2 |  | 3 |
| <i>TSC1</i>    | 2 | 2 |   |  | 3 |
| <i>TSC2</i>    | 2 | 2 |   |  | 3 |

A: Affirmative interaction, DI: Decreased interaction, N: No effect, Freq: Frequency of occurrence, Score: Evidence score given.



ESM Table 6. Literature identified gene *p*-values based on GoDARTS metformin related HbA1c reduction association *p*-values.

| Gene symbol    | MGENTA gene association <i>p</i> -value | Chromosome | Gene start Position | Gene end position | Number of SNPs per gene | Number of independent SNPs per gene | Best SNP rs number | Best SNP position | Best SNP <i>p</i> -value |
|----------------|-----------------------------------------|------------|---------------------|-------------------|-------------------------|-------------------------------------|--------------------|-------------------|--------------------------|
| <i>ABCB1</i>   | $3.84 \times 10^{-01}$                  | 7          | 87133178            | 87342639          | 794                     | 25                                  | rs10600040         | 87255727          | $2.98 \times 10^{-03}$   |
| <i>AKT1</i>    | $5.12 \times 10^{-01}$                  | 14         | 105235686           | 105262080         | 1022                    | 10                                  | rs11226710         | 105237744         | $2.92 \times 10^{-03}$   |
| <i>ALPP</i>    | $6.09 \times 10^{-01}$                  | 2          | 233243347           | 233247599         | 541                     | 13                                  | rs112061397        | 233144482         | $8.41 \times 10^{-03}$   |
| <i>ATM</i>     | $1.13 \times 10^{-05}$                  | 11         | 108093558           | 108239826         | 506                     | 25                                  | rs680113           | 108165406         | $1.64 \times 10^{-06}$   |
| <i>BGLAP</i>   | $9.45 \times 10^{-01}$                  | 1          | 156211950           | 156213123         | 387                     | 8                                   | rs72708271         | 156117584         | $5.38 \times 10^{-02}$   |
| <i>CASP3</i>   | $1.88 \times 10^{-01}$                  | 4          | 185548849           | 185570629         | 768                     | 14                                  | rs78413518         | 185521097         | $1.07 \times 10^{-03}$   |
| <i>CCNE1</i>   | $9.72 \times 10^{-01}$                  | 19         | 30302900            | 30315219          | 550                     | 18                                  | rs147992161        | 30223055          | $6.82 \times 10^{-02}$   |
| <i>CFTR</i>    | $6.10 \times 10^{-01}$                  | 7          | 117120016           | 117308718         | 589                     | 20                                  | rs145128188        | 117141417         | $8.51 \times 10^{-03}$   |
| <i>CYP19A1</i> | $7.29 \times 10^{-01}$                  | 15         | 51500253            | 51630795          | 868                     | 39                                  | rs7170255          | 51479102          | $8.47 \times 10^{-03}$   |
| <i>CYP3A4</i>  | $4.13 \times 10^{-01}$                  | 7          | 99354582            | 99381811          | 313                     | 8                                   | rs62471959         | 99461600          | $5.34 \times 10^{-03}$   |
| <i>DDIT3</i>   | $5.02 \times 10^{-01}$                  | 12         | 57910370            | 57914300          | 236                     | 6                                   | rs201740211        | 57896512          | $1.06 \times 10^{-02}$   |
| <i>DDIT4</i>   | $5.74 \times 10^{-01}$                  | 10         | 74033676            | 74035797          | 244                     | 7                                   | rs144889863        | 74062751          | $1.34 \times 10^{-02}$   |
| <i>ERBB2</i>   | $7.47 \times 10^{-01}$                  | 17         | 37844392            | 37884915          | 411                     | 7                                   | rs200173           | 37825089          | $2.23 \times 10^{-02}$   |
| <i>FBP1</i>    | $4.13 \times 10^{-01}$                  | 9          | 97365420            | 97402531          | 717                     | 18                                  | rs117307207        | 97430018          | $3.62 \times 10^{-03}$   |
| <i>FOXO3</i>   | $7.53 \times 10^{-01}$                  | 6          | 108881025           | 109005971         | 547                     | 34                                  | rs6913023          | 109037698         | $1.23 \times 10^{-02}$   |

|               |                        |    |           |           |      |    |             |                     |                        |
|---------------|------------------------|----|-----------|-----------|------|----|-------------|---------------------|------------------------|
| <i>G6PC</i>   | 4.77×10 <sup>-04</sup> | 17 | 41052814  | 41065386  | 147  | 5  | rs2593595   | 41053567            | 3.61×10 <sup>-04</sup> |
| <i>GAPDH</i>  | 9.76×10 <sup>-01</sup> | 12 | 6643656   | 6647536   | 510  | 9  | rs2534718   | 6575191             | 7.62×10 <sup>-02</sup> |
| <i>GLPIR</i>  | 5.35×10 <sup>-01</sup> | 6  | 39016556  | 39055520  | 664  | 40 | rs114603402 | 38935443            | 3.84×10 <sup>-03</sup> |
| <i>HIF1A</i>  | 8.33×10 <sup>-01</sup> | 14 | 62162118  | 62214977  | 573  | 17 | rs142992098 | 62238358            | 2.22×10 <sup>-02</sup> |
| <i>IGFBP1</i> | 4.96×10 <sup>-01</sup> | 7  | 45927958  | 45933267  | 548  | 17 | rs150899434 | 45942780            | 5.18×10 <sup>-03</sup> |
| <i>IL1RN</i>  | 6.91×10 <sup>-01</sup> | 2  | 113875469 | 113891593 | 764  | 20 | rs34645404  | 113781977           | 7.77×10 <sup>-03</sup> |
| <i>IL6</i>    | 5.73×10 <sup>-01</sup> | 7  | 22766765  | 22771621  | 510  | 29 | rs140043929 | 22747558            | 5.93×10 <sup>-03</sup> |
| <i>INS</i>    | 5.86×10 <sup>-01</sup> | 11 | 2181008   | 2182439   | 664  | 14 | rs11042982  | 2199963             | 6.85×10 <sup>-03</sup> |
| <i>INSR</i>   | 1.73×10 <sup>-01</sup> | 19 | 7112265   | 7294011   | 1115 | 37 | rs78958726  | 7273380             | 7.80×10 <sup>-04</sup> |
| <i>IRS2</i>   | 6.78×10 <sup>-02</sup> | 13 | 110406183 | 110438914 | 712  | 26 | rs9559662   | 110468273           | 2.89×10 <sup>-04</sup> |
| <i>KLF15</i>  | 4.24×10 <sup>-01</sup> | 3  | 126061477 | 126076236 | 622  | 20 | rs9814339   | 126026343           | 3.66×10 <sup>-03</sup> |
| <i>MAPK1</i>  | 1.09×10 <sup>-01</sup> | 22 | 22113946  | 22221970  | 728  | 10 | rs55741555  | 22076177            | 8.42×10 <sup>-04</sup> |
| <i>MAPK3</i>  | 9.76×10 <sup>-01</sup> | 16 | 30125425  | 30134630  | 171  | 2  | rs72791248  | 30195791            | 1.20×10 <sup>-01</sup> |
| <i>MAPK8</i>  | 2.46×10 <sup>-01</sup> | 10 | 49609686  | 49643183  | 485  | 19 | rs116987484 | 49672244            | 2.58×10 <sup>-03</sup> |
| <i>MEF2A</i>  | 1.64×10 <sup>-01</sup> | 15 | 100106132 | 100256629 | 543  | 35 | rs827796    | 100233972           | 2.36×10 <sup>-03</sup> |
| <i>MYC</i>    | 1.15×10 <sup>-01</sup> | 8  | 128748314 | 128753680 | 494  | 22 | rs117788644 | 128736412           | 7.01×10 <sup>-04</sup> |
| <i>NFKB1</i>  | 6.30×10 <sup>-01</sup> | 4  | 103422485 | 103538459 | 738  | 28 | rs72694174  | 103378675           | 8.10×10 <sup>-03</sup> |
| <i>NFKBIA</i> | 6.30×10 <sup>-01</sup> | 14 | 35870715  | 35873960  | 581  | 16 | rs184267819 | 35924185            | 9.31×10 <sup>-03</sup> |
| <i>NR0B2</i>  | 9.51×10 <sup>-01</sup> | 1  | 27237974  | 27240567  | 233  | 4  | rs35308549  | 27329668            | 8.28×10 <sup>-02</sup> |
| <i>NR1I2</i>  | 2.10×10 <sup>-01</sup> | 3  | 119499330 | 119537332 | 493  | 10 | rs146888713 | 119576813:119576814 | 1.67×10 <sup>-03</sup> |

|                 |                        |    |           |           |      |    |             |                     |                        |
|-----------------|------------------------|----|-----------|-----------|------|----|-------------|---------------------|------------------------|
| <i>PCK1</i>     | 4.44×10 <sup>-01</sup> | 20 | 56136136  | 56141513  | 732  | 47 | rs79015822  | 56145543            | 2.02×10 <sup>-03</sup> |
| <i>PCK2</i>     | 5.90×10 <sup>-01</sup> | 14 | 24563482  | 24573339  | 469  | 19 | rs186277859 | 24605750            | 8.49×10 <sup>-03</sup> |
| <i>PIK3CA</i>   | 2.46×10 <sup>-01</sup> | 3  | 178866310 | 178952497 | 733  | 17 | rs193167136 | 178812305           | 1.71×10 <sup>-03</sup> |
| <i>PKLR</i>     | 3.28×10 <sup>-01</sup> | 1  | 155259083 | 155271225 | 203  | 3  | rs200273777 | 155245340:155245343 | 5.86×10 <sup>-03</sup> |
| <i>PPARA</i>    | 1.89×10 <sup>-01</sup> | 22 | 46546498  | 46639653  | 1042 | 24 | rs111300180 | 46605588            | 5.37×10 <sup>-04</sup> |
| <i>PPARGC1A</i> | 2.45×10 <sup>-01</sup> | 4  | 23793643  | 23891700  | 774  | 39 | rs623570    | 23997969            | 1.23×10 <sup>-03</sup> |
| <i>PPP2R4</i>   | 2.65×10 <sup>-01</sup> | 9  | 131873227 | 131911225 | 339  | 39 | rs17452568  | 131787906           | 1.67×10 <sup>-03</sup> |
| <i>PRKAA2</i>   | 2.62×10 <sup>-01</sup> | 1  | 57110989  | 57181008  | 886  | 29 | rs142551250 | 57207265            | 1.43×10 <sup>-03</sup> |
| <i>RAB4A</i>    | 2.41×10 <sup>-01</sup> | 1  | 229406878 | 229440518 | 546  | 18 | rs76367805  | 229304470           | 1.68×10 <sup>-03</sup> |
| <i>RPS6KA1</i>  | 4.90×10 <sup>-01</sup> | 1  | 26856248  | 26901520  | 423  | 12 | rs114289390 | 26800490            | 6.40×10 <sup>-03</sup> |
| <i>RPS6KB1</i>  | 6.24×10 <sup>-01</sup> | 17 | 57970442  | 58027786  | 413  | 8  | rs184781576 | 57940064            | 1.19×10 <sup>-02</sup> |
| <i>SEPP1</i>    | 1.75×10 <sup>-02</sup> | 5  | 42799981  | 42812024  | 545  | 15 | rs2548366   | 42919122            | 1.42×10 <sup>-04</sup> |
| <i>SERPINE1</i> | 6.20×10 <sup>-01</sup> | 7  | 100770378 | 100782547 | 610  | 14 | rs6961122   | 100663854           | 9.25×10 <sup>-03</sup> |
| <i>SHBG</i>     | 5.14×10 <sup>-01</sup> | 17 | 7517381   | 7536700   | 589  | 12 | rs118051719 | 7566428             | 6.63×10 <sup>-03</sup> |
| <i>SIRT1</i>    | 3.76×10 <sup>-01</sup> | 10 | 69644426  | 69678147  | 537  | 6  | rs141838640 | 69674786            | 4.09×10 <sup>-03</sup> |
| <i>SLC22A1</i>  | 1.97×10 <sup>-03</sup> | 6  | 160542862 | 160579750 | 505  | 25 | rs117143470 | 160575008           | 2.39×10 <sup>-05</sup> |
| <i>SLC22A2</i>  | 1.51×10 <sup>-01</sup> | 6  | 160637793 | 160679963 | 931  | 29 | rs477900    | 160622502           | 5.72×10 <sup>-04</sup> |
| <i>SLC22A3</i>  | 2.85×10 <sup>-01</sup> | 6  | 160769424 | 160876014 | 987  | 31 | rs117965696 | 160713517           | 1.49×10 <sup>-03</sup> |
| <i>SLC29A4</i>  | 2.26×10 <sup>-01</sup> | 7  | 5322560   | 5343704   | 866  | 16 | rs199935547 | 5351460             | 1.47×10 <sup>-03</sup> |
| <i>SLC2A4</i>   | 3.24×10 <sup>-04</sup> | 17 | 7185053   | 7191367   | 318  | 14 | rs35355120  | 7106038             | 2.46×10 <sup>-05</sup> |

|                |                        |    |           |           |     |    |             |           |                        |
|----------------|------------------------|----|-----------|-----------|-----|----|-------------|-----------|------------------------|
| <i>SLC47A1</i> | $9.29 \times 10^{-01}$ | 17 | 19437166  | 19482346  | 361 | 16 | rs1808941   | 19451938  | $4.55 \times 10^{-02}$ |
| <i>SLC47A2</i> | $7.01 \times 10^{-01}$ | 17 | 19581627  | 19620043  | 459 | 18 | rs140605101 | 19609812  | $1.38 \times 10^{-02}$ |
| <i>STAT3</i>   | $8.91 \times 10^{-01}$ | 17 | 40465342  | 40540513  | 518 | 8  | rs2354155   | 40546652  | $3.48 \times 10^{-02}$ |
| <i>STK11</i>   | $8.61 \times 10^{-01}$ | 19 | 1205797   | 1228434   | 633 | 19 | rs143476328 | 1200738   | $1.98 \times 10^{-02}$ |
| <i>TP53</i>    | $5.36 \times 10^{-01}$ | 17 | 7571719   | 7590863   | 532 | 14 | rs118051719 | 7566428   | $6.63 \times 10^{-03}$ |
| <i>TSC1</i>    | $7.34 \times 10^{-01}$ | 9  | 135766734 | 135820020 | 701 | 30 | rs112985725 | 135802090 | $9.90 \times 10^{-03}$ |
| <i>TSC2</i>    | $9.75 \times 10^{-02}$ | 16 | 2097989   | 2138713   | 711 | 15 | rs144901786 | 2166255   | $5.66 \times 10^{-04}$ |
| <i>TXNIP</i>   | $7.52 \times 10^{-01}$ | 1  | 145438461 | 145442628 | 174 | 7  | rs9245      | 145438581 | $2.69 \times 10^{-02}$ |

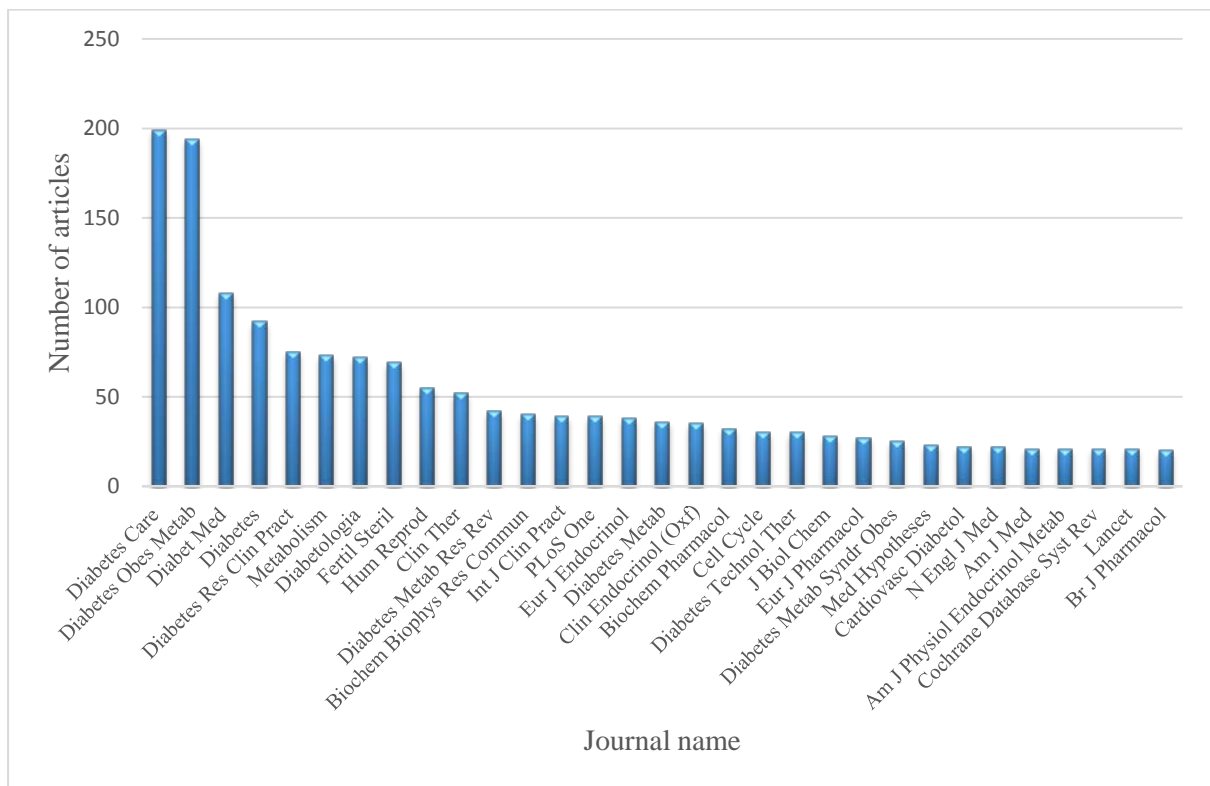

ESM Fig. 1. Frequency of full text articles downloaded by journal name.

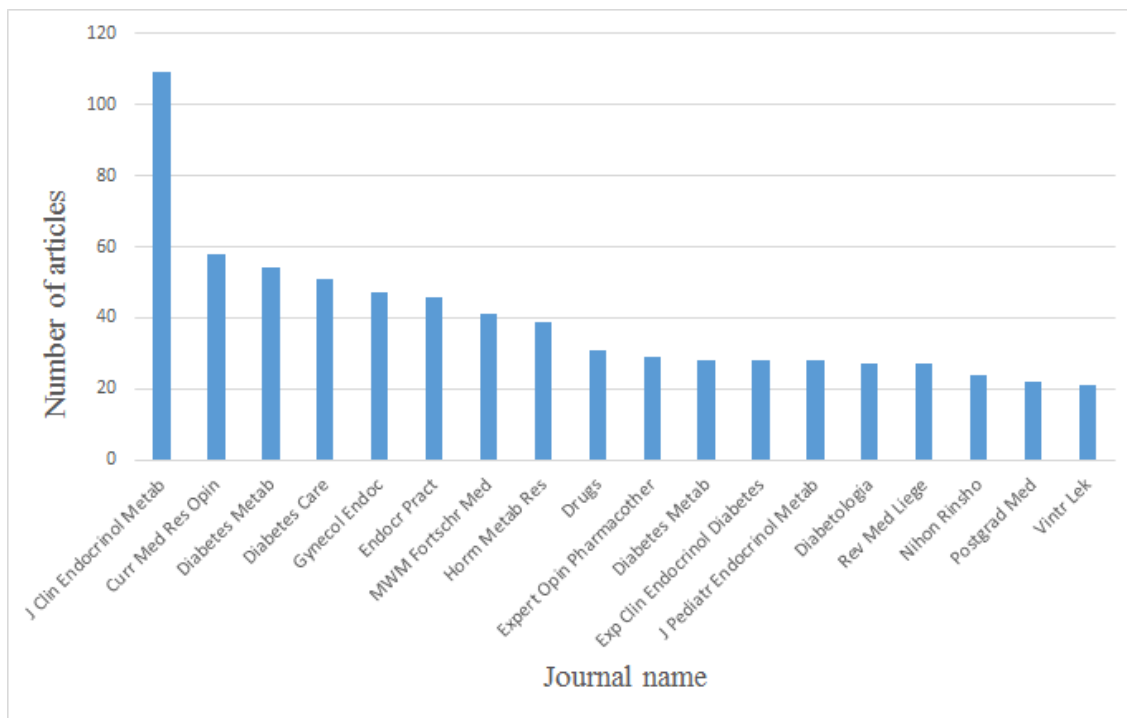

ESM Fig. 2. Frequency of abstracts downloaded by journal name.

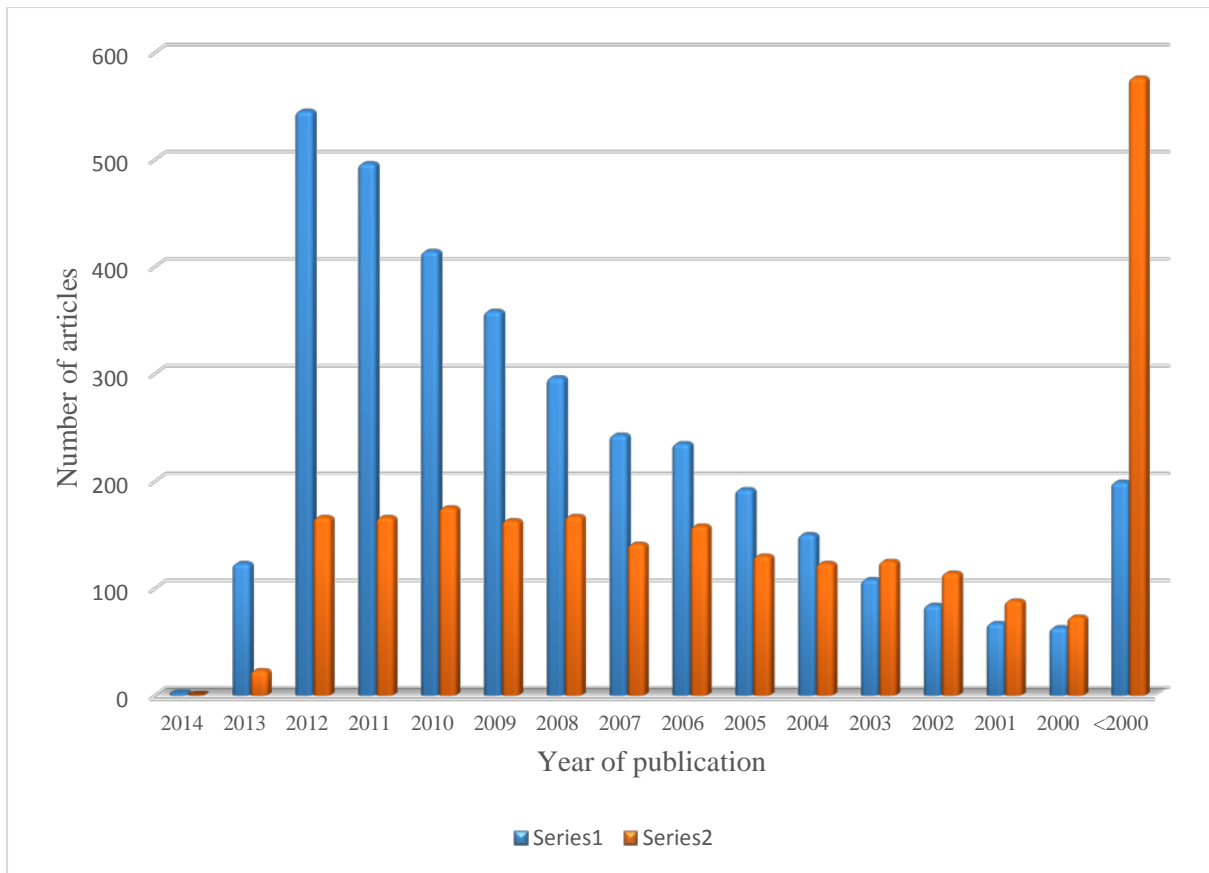

ESM Fig. 3. Article frequency by year of publication. Series 1: Full text articles, Series 2: Abstracts.

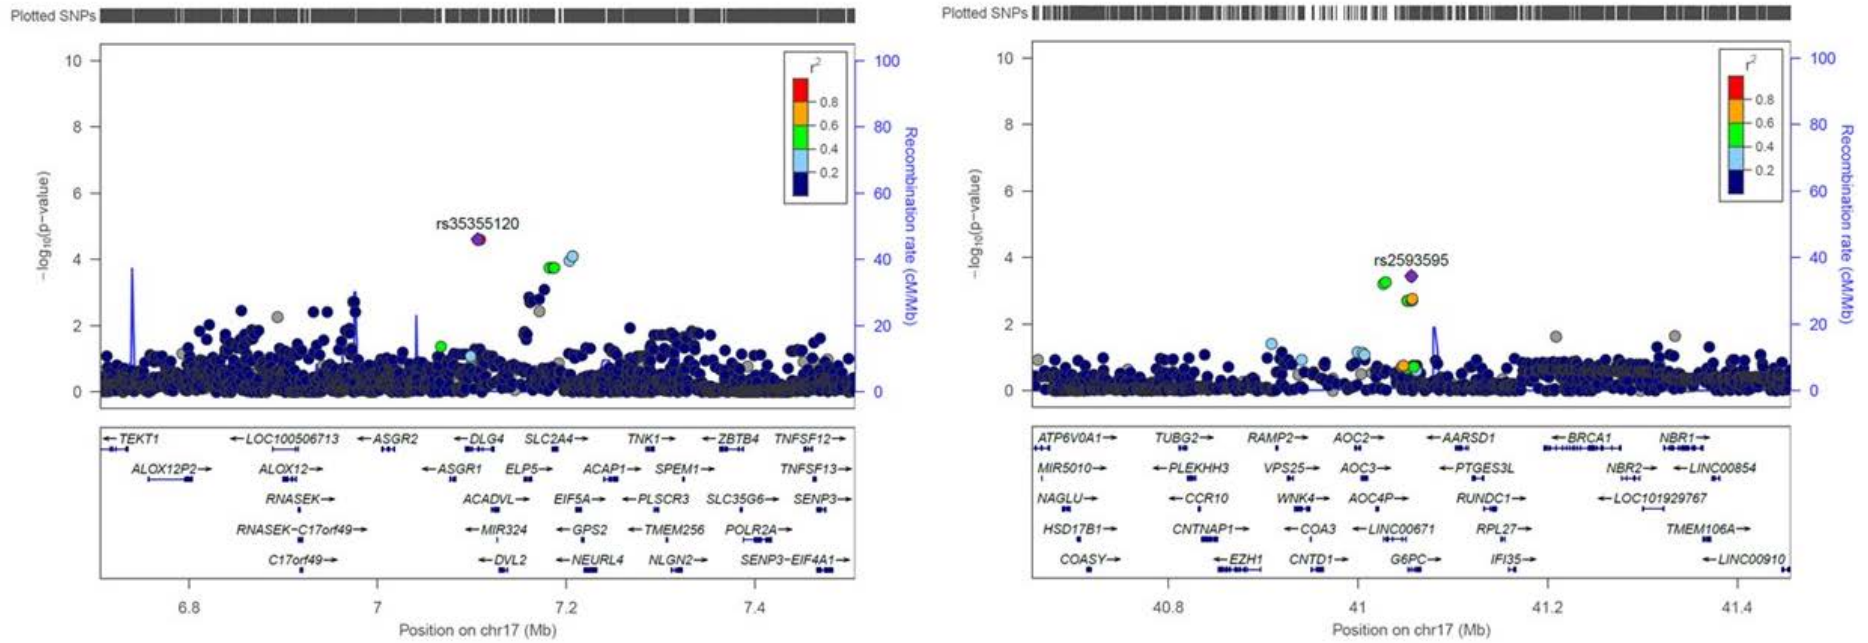

ESM Fig. 4. Regional association plots around the SLC2A4 (left) and G6PC (right) locus at chromosome 17
